# Supplementary material
Source: PubMed Central journal article supplement (PMC546424)
Supplement: JCI0522326sd.pdf [file JCI0522326sd.pdf]

**a**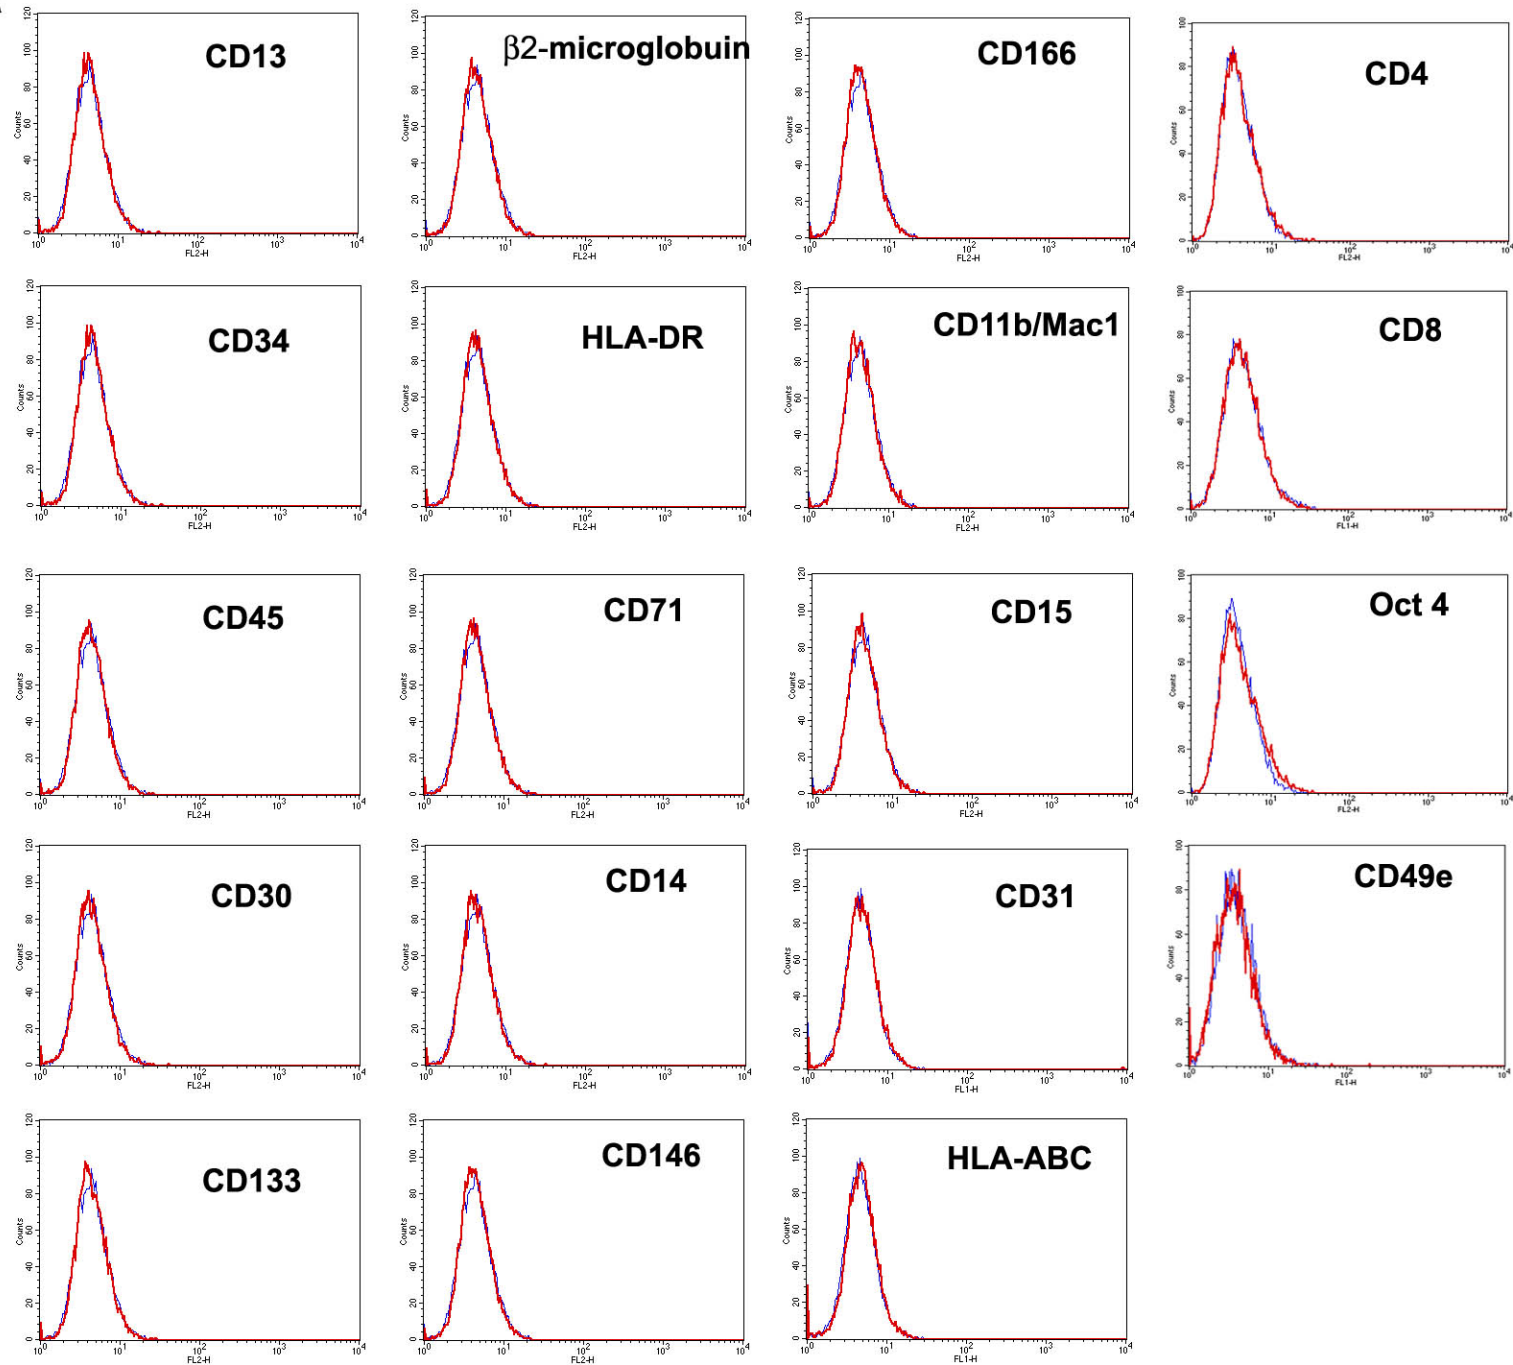**Suppl. Figure 1**

## b Positive Control for FACS

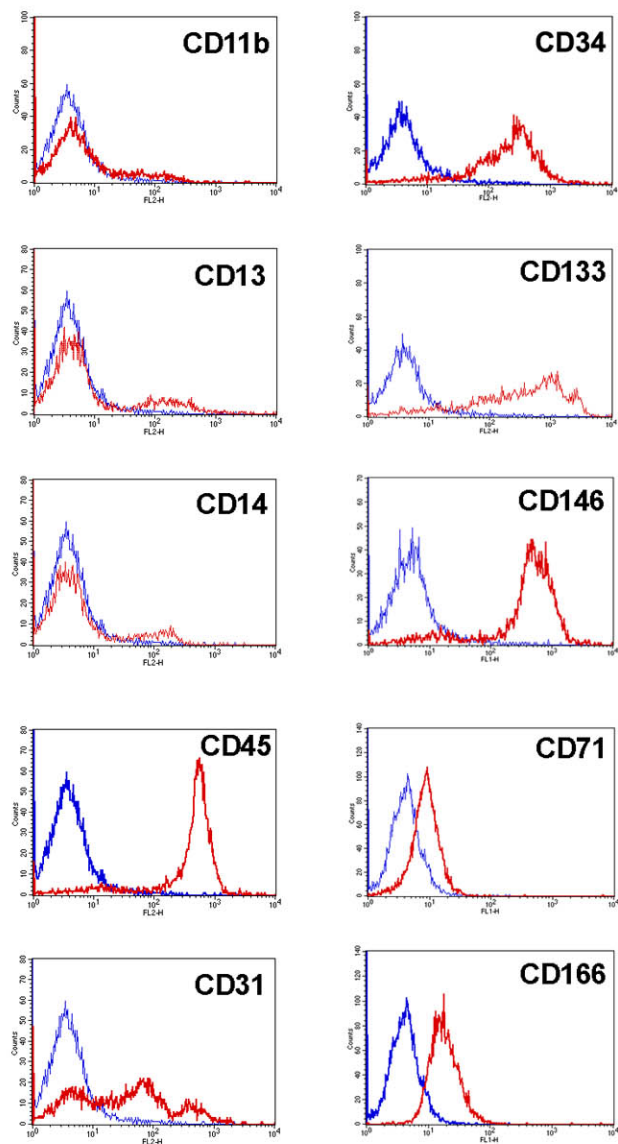

## c TRAP assay

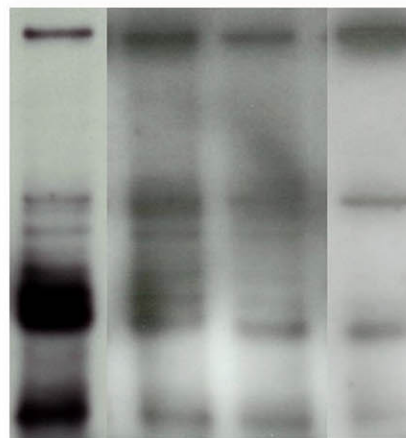

Suppl. Figure 1

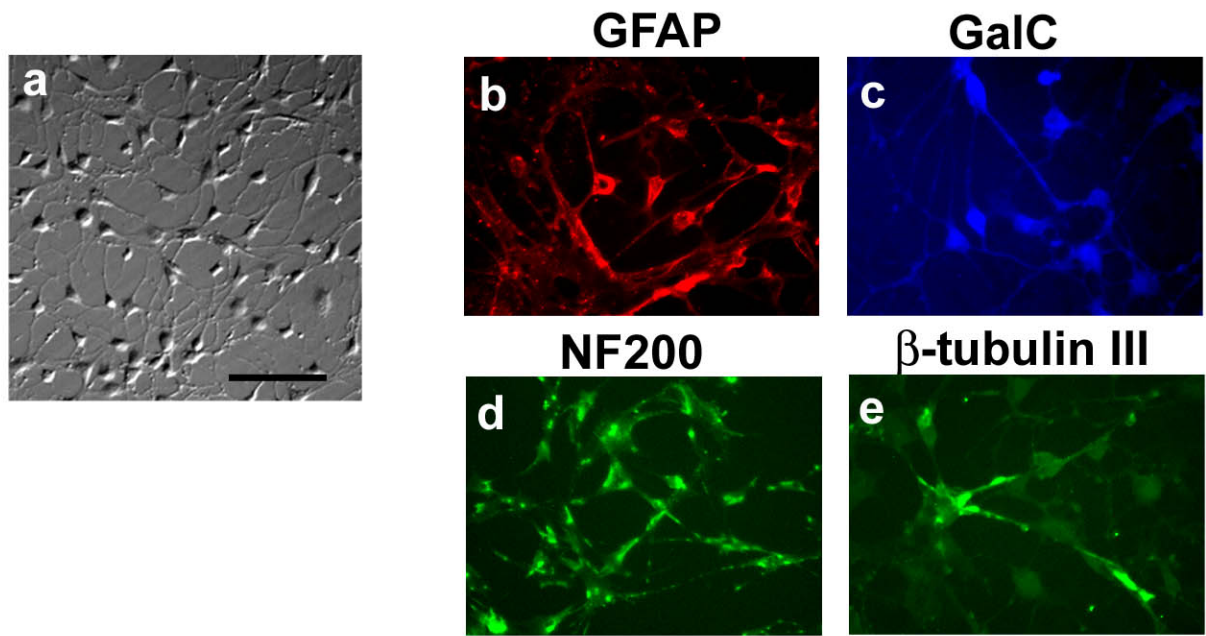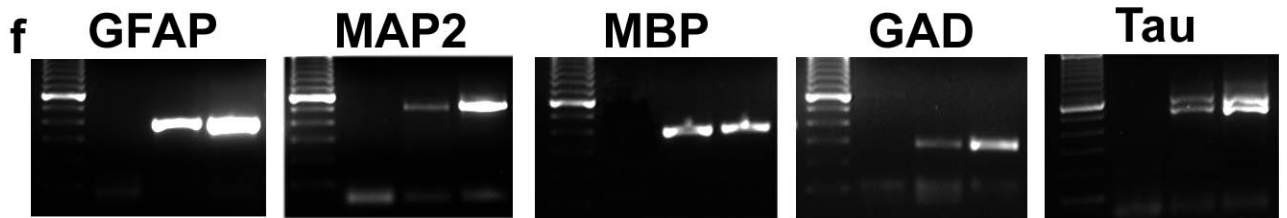

Lane 1: Size marker, Lane2: Pre-diff, Lane 3: Induced diff, Lane 4: Positive control

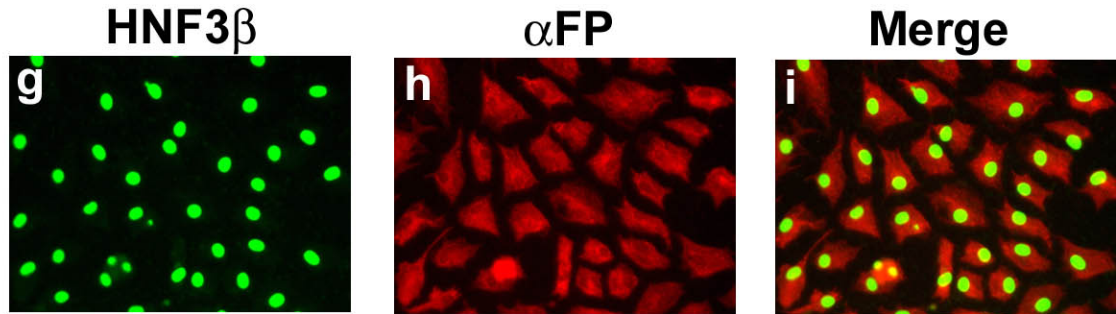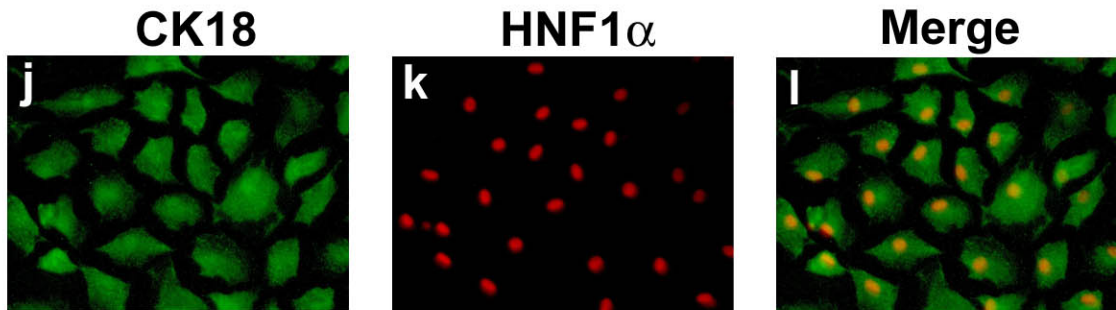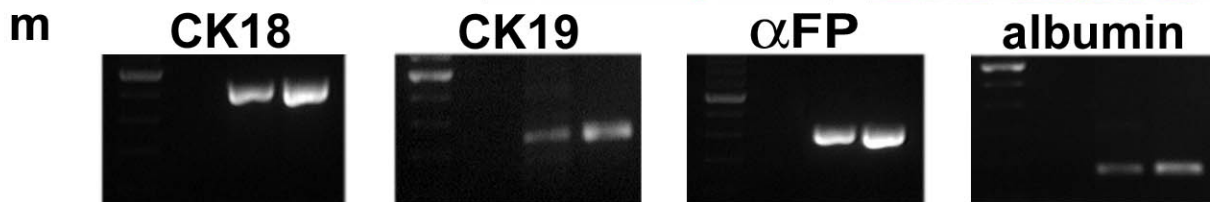

Lane 1: Size marker, Lane2: Pre-diff, Lane 3: Induced diff, Lane 4: Positive control

## Suppl. Figure 2

**hBMSC**

**TBMC**

**PBS**

**a**

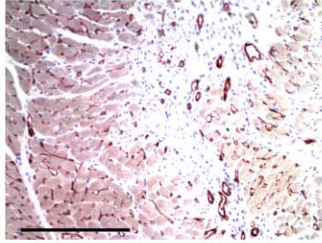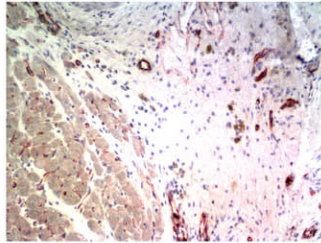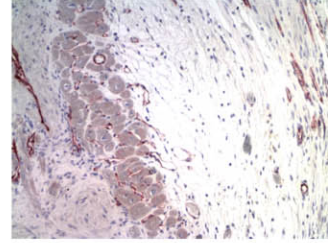

**b**

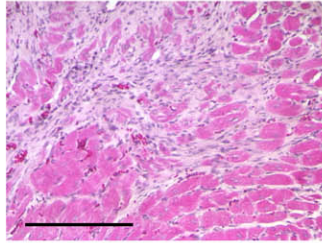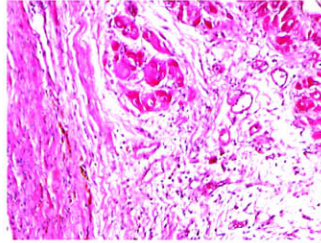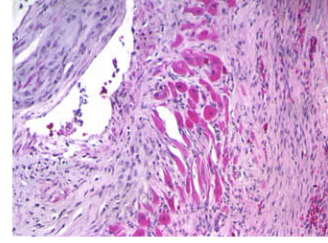

**c**

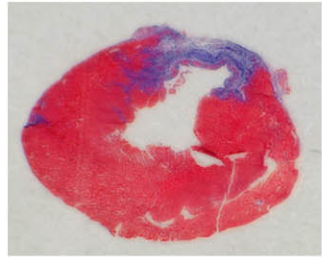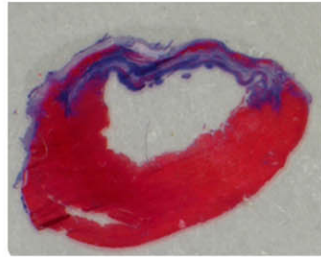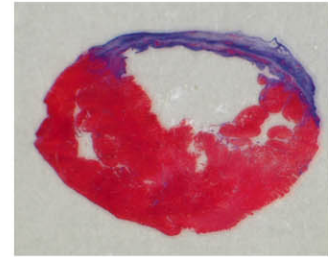

**Suppl. Figure 3**

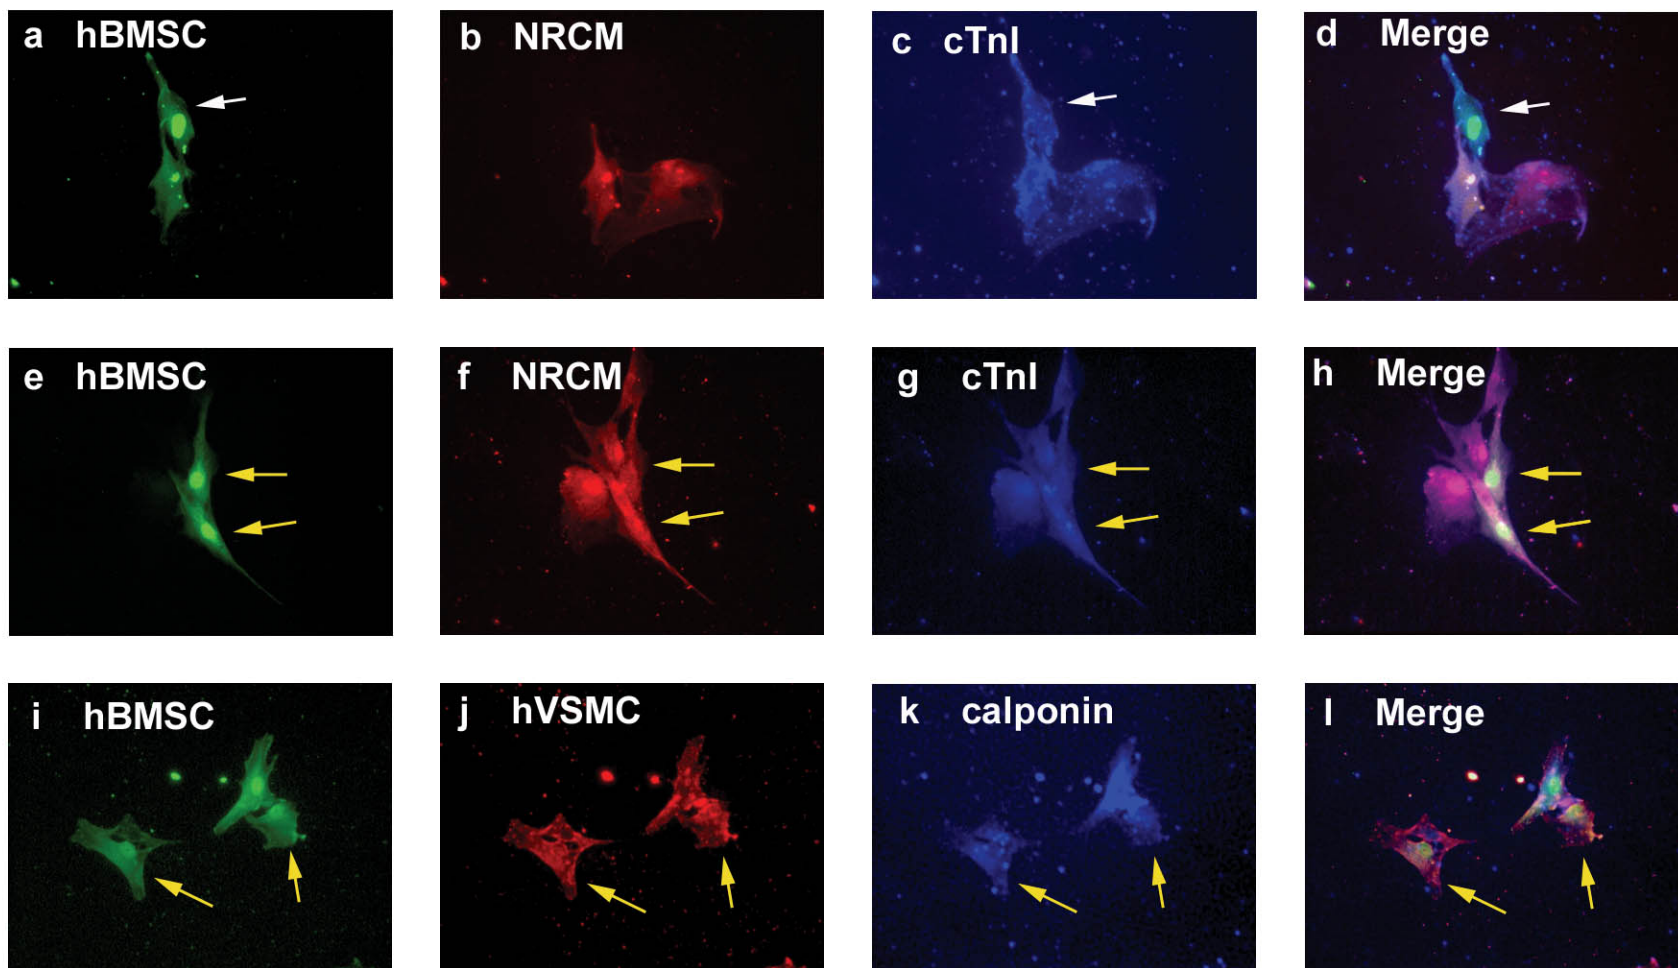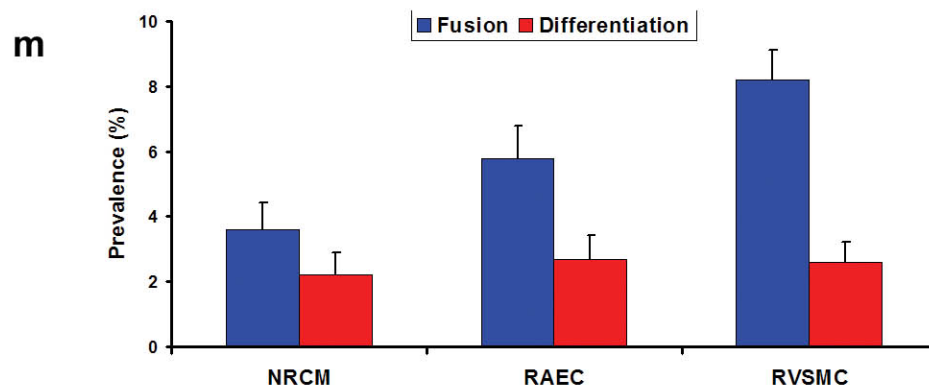

**Supple. Figure 4**

**a**

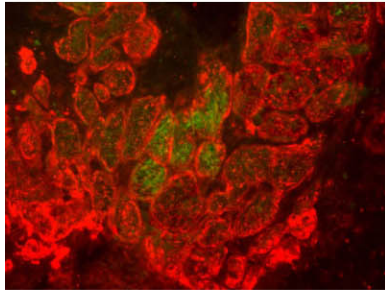

**b**

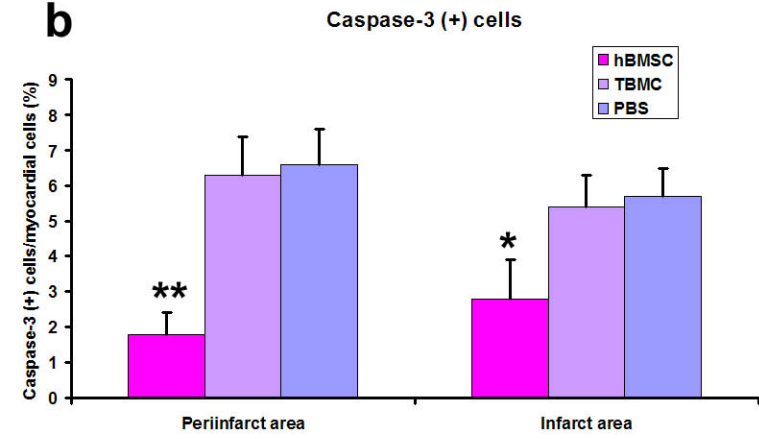

**c**

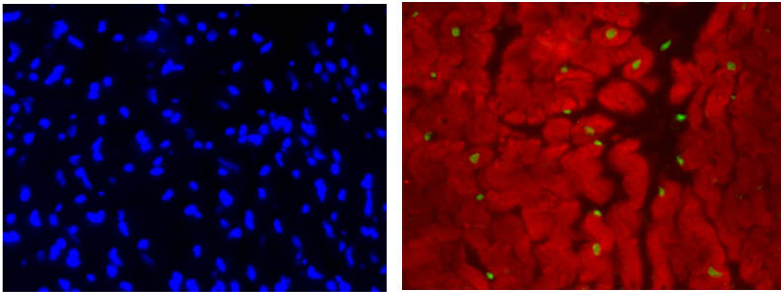

**d**

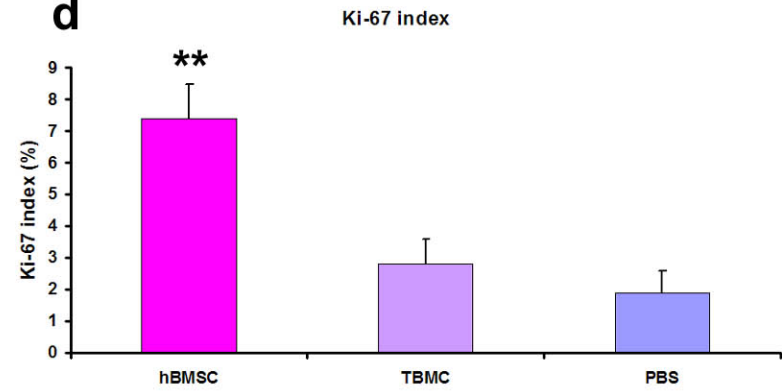

**Suppl. Figure 5**

## Supplementary Information

**Supplementary Figure 1. FACS analysis of hBMSC using multiple surface epitopes.** **a.** Various bone-marrow derived lineage specific markers, known HSC markers (CD34, CD133, Flk-1, Tie2) and major histocompatibility complex (MHC) class I (ABC) and II (DR) were not expressed. **b.** Positive control for FACS antibodies. We used peripheral blood for CD11b, CD13, CD14, CD45 and CD31 antibodies, magnetic column-selected (CliniMacs, Miltenyl Biotec, Germany) CD34 and CD133 cells from peripheral blood for CD34 and CD133 antibodies, HUVEC for CD146 antibody and fibroblast for CD71 and CD166 antibodies. **c.** Telomerase activity assessed by TRAP assay was detected in hBMSCs with both low (20, lane 2) and high (120, lane 3) PDs. Lane 1, positive control (T293 cell), Lane 4, negative control (human vascular smooth muscle cells).

**Supplementary Figure 2. In vitro differentiation of hBMSC into neural and endodermal lineages.** **a.** Morphologic characteristics of hBMSC in the neural differentiation culture showing typical appearance of neural cells. Scale bar = 100  $\mu$ m. **b-e.** IF staining of hBMSC after induction of neural differentiation demonstrates expression of multiple neural specific proteins: GFAP (astrocytes), GalC (oligodendrocytes), NF200 (neurons), and  $\beta$ -tubulin III (neurons). **f.** RT-PCR confirms de novo expression of neural lineage-specific genes, GFAP, MBP, oligodendrocyte, MAP2 (neurons), GAD (neurons), and Tau (neurons) after induced neural differentiation. **g-l.** Phenotypic characterization of hBMSC differentiation into endodermal (epithelioid) cells. IF localization of HNF 3 $\beta$  (FITC) and  $\alpha$ FP (Cy3) at day 10 (g-i), and CK18 (FITC) and HNF 1 $\alpha$  (Cy3) at day 14 (j-l) in cultured hBMSC on Matrigel with media containing HGF, FGF-4 and DMSO. **m.** RT-PCR confirms de novo expression of endodermal lineage-specific genes, CK18, CK19,  $\alpha$ FP and albumin after induced endodermal differentiation. diff: differentiation. Heavy band in the lane of the size markers in RT-PCR (f and m) = 600bp. Original magnification x 200.

**Supplementary Figure 3. Representative histologic illustration of capillary and CMC density, and myocardial fibrosis and representative gel photographs of Western blot and semiquantitative RT-PCR product.** **a.** Representative immunohistochemical findings for CD31 in infarct myocardium 4 wks after cell transplantation showing significantly higher capillary density in hBMSC transplanted heart tissue. **b.** Representative findings of infarct area stained with H&E demonstrate notable salvage and regeneration of myocardium in an hBMSC-transplanted heart. **c.** Representative figures of Masson's trichrome-stained hearts showing significantly smaller area of

percent fibrosis (blue color) in hBMSC transplanted heart tissue. Scale bar, 100 $\mu$ m

**Supplementary Figure 4.** Fusion and Differentiation of hBMSC in co-culture with cardiomyocytes, smooth muscle cells and endothelial cells. **a-h.** Co-culture of hBMSC and NRCM for investigation of cell fusion and differentiation. We co-cultured hBMSC transfected with lentiviral-eGFP (green fluorescence) (a, e), and NRCM transfected with adenoviral-LacZ (red fluorescence detected by  $\beta$ -galactosidase staining) (b, f). Seven days after co-culture, cells were stained with cTnI followed by AMCA-conjugated secondary antibody (blue fluorescence) (c, g). In the IF images, an hBMSC which has differentiated into CMC lineage is illustrated by red and blue fluorescence without green fluorescence (white arrows in a-d). Triple color positive cells are fusion cells expressing cTnI (yellow arrows in e-h). **i-l.** Co-culture of hBMSC and rat vascular smooth muscle cells (RVSMC). We co-cultured hBMSC transfected with lentiviral-eGFP (green fluorescence)(i) and RVSMC transfected with adenoviral-LacZ (red fluorescence detected by  $\beta$ -galactosidase staining)(j). Seven days after co-culture, cells were stained with calponin followed by AMCA-conjugated secondary antibody (blue fluorescence)(k). Arrows in i-l indicates fused hBMSCS (green) and RVSMC (red) which express calponin. **m.** Incidence of fusion and differentiation in co-culture of hBMSC with NRCM, RVSMC and RAEC, respectively. Original magnification x 400.

**Supplementary Figure 5. Immunohistochemistry with caspase-3 and Ki-67.** **a.** Representative immunohistochemical findings for activated caspase-3 and  $\alpha$ -sarcomeric actinin in periinfarct area at 1 wk after PBS injection revealing expression of caspase-3 (green fluorescence) within cardiomyocytes (red fluorescence) suggestive of apoptosis. **b.** Quantitative analysis of activated caspase-3 positive cells showed that hBMSC transplanted hearts have significantly lower number of apoptotic cells. **c.** Representative immunohistochemical findings for Ki-67 and  $\alpha$ -sarcomeric actinin at 1 wk after hBMSC transplantation showing Ki-67 positive cells (green fluorescence) in periinfarct area. **d.** Ki-67 index was significantly higher in hBMSC transplanted hearts compared with TBMC or PBS treated hearts. \* $P < 0.05$ , \*\* $P < 0.01$ , vs. TBMC, PBS. Original magnification x 400.



**Supplementary Table 1. RT-PCR primer sequences and expected product size**

| Primers          | Sequences                                     | Product Size(bp) |
|------------------|-----------------------------------------------|------------------|
| <b>Human</b>     |                                               |                  |
| Oct4-f           | 5'- GAG AAC AAT GAG AAC CTT CAG GAG A -3'     | 219              |
| Oct4-r           | 5'- TTC TGG CGC CGG TTA CAG AAC CA -3'        |                  |
| CD34-f           | 5'- ACC ACT TCC CTC ATC TCT CCT CCA A-3'      | 421              |
| CD34-r           | 5'- AGG GTG AGG GAG GCA GAG ACA GAA A-3'      |                  |
| KDR-f            | 5'- TGC AGG ACC AAG GAG ACT ATG T-3'          | 458              |
| KDR-r            | 5'- TAG GAT GAT GAC AAG AAG TAG CC-3'         |                  |
| Tie2-f           | 5'- ATC CCA TTT GCA AAG CTT CTG GCT GGC-3'    | 512              |
| Tie2-r           | 5'- TGT GAA GCG TCT CAC AGG TCC AGG ATG-3'    |                  |
| CD31-f           | 5'- AGG TCA GCA GCA TCG TGG TCA ACA T-3'      | 387              |
| CD31-r           | 5'- GTG GGG TTG TCT TTG AAT ACC GCA G-3'      |                  |
| VE-cadherin-f    | 5'- CTC TGC ATC CTC ACC ATC ACA G-3'          | 389              |
| VE-cadherin-r    | 5'- TAG CCG TAG ATG TGC AGC GTG T-3'          |                  |
| SM1-f            | 5'- TAA ACA CCT GCC CAT CTA CTC GG-3'         | 732              |
| SM1-r            | 5'- ATC TCA TCA TCC TGG GCT GCT GG-3'         |                  |
| SM22 $\alpha$ -f | 5'- CGG CTG GTG GAG TGG ATC ATA G-3'          | 489              |
| SM22 $\alpha$ -r | 5'- CCC TCT GTT GCT GCC CAT CTG A-3'          |                  |
| PDGFRb-f         | 5'- GCC TTA CCA CAT CCG CTC -3'               | 443              |
| PDGFRb-r         | 5'- TCA CAC TCT TCC GTC ACA TTG C -3'         |                  |
| GATA4-f          | 5'- AGA-CAT-CGC-ACT-GAC-TGA-GAA-C-3'          | 475              |
| GATA4-r          | 5'- GAC-GGG-TCA-CTA-TCT-GTG-CAA-C-3'          |                  |
| Nkx2.5-f         | 5'- CTT-CAA-GCC-AGA-GGC-CTA-CG-3'             | 233              |
| Nkx2.5-r         | 5'- CCG-CCT-CTG-TCT-TCT-TCA-GC-3'             |                  |
| A FP-f           | 5'- TGC AGC CAA AGT GAA GAG GGA AGA-3'        | 343              |
| AFP-r            | 5'- CAT AGC GAG CAG CCC AAA GAA GAA-3'        |                  |
| Alb-f            | 5'- TGC TTG AAT GTG CTG ATG ACA GGG-3'        | 181              |
| Alb-r            | 5'- AAG GCA AGT CAG CAG GCA TCT CAT C-3'      |                  |
| CK18-f           | 5'- GTA CTG GTC TCA GCA GAT TGA GGA G-3'      | 499              |
| CK18-r           | 5'- GCT TCT GCT GGC TTA ATG CCT CAG A-3'      |                  |
| CK19-f           | 5'- ATG GCC GAG CAG AAC CGG AA-3'             | 318              |
| CK19-r           | 5'- CCA TGA GCC GCT GGT ACT CC-3'             |                  |
| GFAP-f           | 5'- TCA TCG CTC AGG AGG TCC TT - 3'           | 383              |
| GFAP-r           | 5'- CTG TTG CCA GAG ATG GAG GTT- 3'           |                  |
| MAP2-f           | 5'- GAA GAC TCG CAT CCG AAT GG - 3'           | 527              |
| MAP2-r           | 5'- CGC AGG ATA GGA GGA AGA GAC T - 3'        |                  |
| MBP-f            | 5'- TTAGCT GAATTC GCG TGT GG - 3'             | 374              |
| MBP-r            | 5'- GAG GAAGTGAAT GAG CCG GTTA- 3'            |                  |
| GAD-f            | 5'- GCG CCA TAT CCA ACA GTG ACA G - 3'        | 284              |
| GAD-r            | 5'- GCC AGC AGT TGC ATT GAC ATA A- 3'         |                  |
| Tau-f            | 5_ - GTA AAA GCA AAG ACG GGA CTG G-3_         | 512/612          |
| Tau-r            | 5_ - ATG ATG GAT GTT GCC TAA TGA G-3_         |                  |
| <b>Rat*</b>      |                                               |                  |
| Nkx2.5-f         | 5'- CAG TGG AGC TGG ACA AAG CC-3'             | 216              |
| Nkx2.5-r         | 5'- TAG CGA CGG TTC TGG AAC CA-3' (32 cycles) |                  |
| GATA4-f          | 5'- CTG TCA TCT CAC TAT GGG CA-3'             |                  |

|                  |                                                      |          |
|------------------|------------------------------------------------------|----------|
| GATA4-r          | 5'- CCA AGT CCG AGC AGG AAT TT-3' (32 cycles)        | 275      |
| MEF2c-f          | 5'- AGC AAG AAT ACG ATG CCA TC-3'                    |          |
| MEF2c-r          | 5'- GAA GGG GTG GTG GTA CGG TC-3'(30 cycles)         | 407, 311 |
| Ang-1-f          | 5'- AGT CGG AGA TGG CCC AGA TAC AAC A -3'            |          |
| Ang-1-r          | 5'- TCC AGC AGT TGG ATT TCA AGA CGG G -3'(28 cycles) | 169      |
| Ang-2-f          | 5'- TAC GTG CTG AAG ATC CAG CTG AAG G -3'            |          |
| Ang-2-r          | 5'- AGT TGG AAG GAC CAC ATG CGT CGA A -3'(30 cycles) | 259      |
| PDGF-B-f         | 5'- CCG AGG AGC TTT ATG AGA TGC TGA G -3'            |          |
| PDGF-B-r         | 5'- AGC TGC CAC TGT CTC ACA CTT GCA T -3'(30 cycles) | 479      |
| IGF1-f           | 5'- ACTTCAACAAGCCCACAGGCTA -3'                       |          |
| IGF1-r           | 5'- TCCTTCTGAGTCTTGGGCATGT -3' (30 cycles)           | 189      |
| SDF1 $\alpha$ -f | 5'- ATGGGACGCCAAGGTCGTCG -3'                         |          |
| SDF1 $\alpha$ -r | 5'- TCGGGTCAATGCACA CTTGTCTGT-3` (32 cycles)         | 223      |
| GAPDH-f          | 5'- TCG GTG TGA ACG GAT TTG GCC GTA T-3'             |          |
| GAPDH-r          | 5'- AGC CCT TCC ACG ATG CCA AAG TTG T-3'(24 cycles)  | 505      |

-f: forward primer, -r: revers primer

( cycles) : RT-PCR cycles used for semiquantitative RT-PCR.
